# Supplementary material for: The Interactions among the Heavy Metals in Soils and in Weeds and Their Antioxidant Capacity under the Mining Activities in Thai Nguyen Province, Vietnam
Source: Hindawi journal article supplement (doi:10.1155/2020/8010376), 2020-10-29
Supplement: f1 [file 8010376.f1.docx]

**The interactions among the heavy metals in soils, in weeds and their antioxidant capacity under the mining activities in Thai Nguyen province, Vietnam**

*Full author names, institutional mailing addresses and email addresses*

Ngoc-Lien Nguyen

Department of Life Sciences, University of Science and Technology of Hanoi, Vietnam Academy of Science and Technology, 18-Hoang Quoc Viet, Cau Giay, Hanoi, Vietnam

[rubynguyenlien@gmail.com](mailto:rubynguyenlien@gmail.com)

Cam-Tu Vu

Department of Water - Environment - Oceanography, University of Science and Technology of Hanoi, Vietnam Academy of Science and Technology, 18-Hoang Quoc Viet, Cau Giay, Hanoi, Vietnam

[vu-cam.tu@usth.edu.vn](mailto:vu-cam.tu@usth.edu.vn)

Hien-Minh To

Department of Life Sciences, University of Science and Technology of Hanoi, Vietnam Academy of Science and Technology, 18-Hoang Quoc Viet, Cau Giay, Hanoi, Vietnam

[minhth.b8110@st.usth.edu.vn](mailto:minhth.b8110@st.usth.edu.vn)

Hoang-Nam Pham

Department of Life Sciences, University of Science and Technology of Hanoi, Vietnam Academy of Science and Technology, 18-Hoang Quoc Viet, Cau Giay, Hanoi, Vietnam

[pham-hoang.nam@usth.edu.vn](mailto:pham-hoang.nam@usth.edu.vn)

Hai-Dang Nguyen

University of Science and Technology of Hanoi, Vietnam Academy of Science and Technology, 18-Hoang Quoc Viet, Cau Giay, Hanoi, Vietnam

[nguyen-hai.dang@usth.edu.vn](mailto:nguyen-hai.dang@usth.edu.vn)

Tien-Dat Nguyen

Center of Research and Technology Transfer, Vietnam Academy of Science and Technology, 18-Hoang Quoc Viet, Cau Giay, Hanoi, Vietnam

[ngtiend@gmail.com](mailto:ngtiend@gmail.com)

Kieu-Oanh Nguyen T.

Department of Life Sciences, University of Science and Technology of Hanoi, Vietnam Academy of Science and Technology, 18-Hoang Quoc Viet, Cau Giay, Hanoi, Vietnam

[nguyen-thi-kieu.oanh@usth.edu.vn](mailto:nguyen-thi-kieu.oanh@usth.edu.vn)

Contents: 01 figure, 01 tables

**SUPPORTING INFORMATION**

Table S1: Description of sampling sites

| Sampling Location | GPS | Soil and corresponding plant samples | Site description |
| --- | --- | --- | --- |
| Thai Nguyen city | N: 21o35’008’’,  E: 105o49’019’’ | *C. parasiticus* | This site is locating in the Campus of Thai Nguyen Iron and Steel Corporation, Cam Gia ward, Thai Nguyen city, Thai Nguyen province. This factory processed the ore into iron and steel from 1959 and became a popular heavy metals production of the Nord of Vietnam. The sample was collected at the waste location of this factory. |
| Dai Tu district | N: 21o39’018’’, E: 105o41’427’’ | *D. linearis*  *P. calomelanos* | This site is locating in Ha Thuong ward, Dai Tu district, Thai Nguyen province. The mine contains mainly Sn. The mining activity has begun since 1987. |
| Dong Hy district | N: 21o43’612”,  E: 105o51’380” | *P. vittata* | This site is locating in Hich village, Tan Long ward, Dong Hy district, Thai Nguyen province, where the mine mainly composes of Pb and Zn. The mining activity has begun since 1980. |


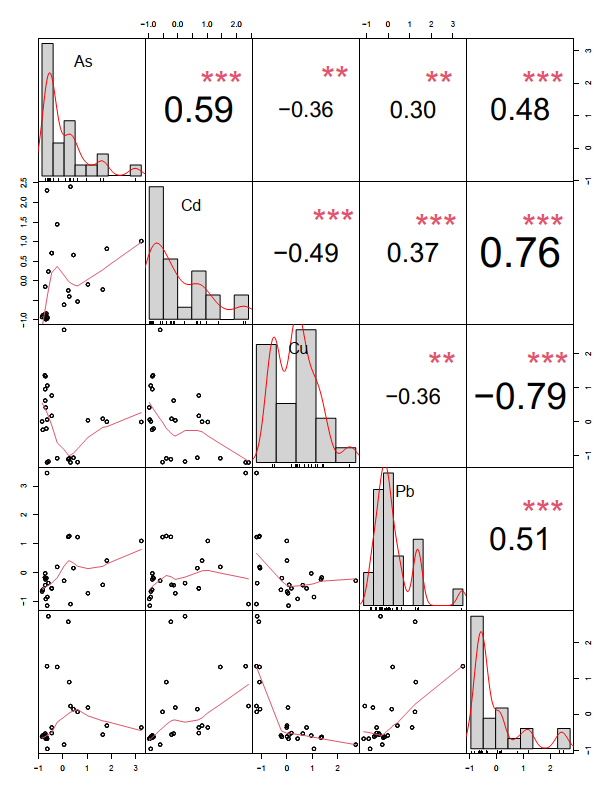


Figure S1: The spearman indices indicate for the correlation of heavy metals’ co-contamination in soils
